# Supplementary material
Source: PubMed Central journal article supplement (PMC2831044)
Supplement: halms371763-supplement_1.pdf [file halms371763-supplement_1.pdf]

## Annex 1

### 1 HIV and HSV-2 statuses of females

For females, the probability of being infected was estimated based on data from a published survey [1]. Indeed, the statuses of the males' partners are unknown. These statuses  $e_k$  ( $k=0, 1, 2, 3$ ) are expressed as four configurations (states) detailed in Table 1. For each female, the covariates are age, HIV and HSV-2 statuses and reported number of sexual partners in the past 12 months. The probability of being in state  $e_k$  was estimated by a multi-class logistic regression. This probability depends on age,  $q$  and the reported number of sexual partners in the past 12 months,  $y$ . Thus, we obtain the following formula:

$$\pi_k(q, y) = \frac{e^{\alpha_k q + \beta_k y}}{\sum_{j=0}^3 e^{\alpha_j q + \beta_j y}}.$$

The reported number of sexual partners in the past 12 months was modeled by a Poisson distribution  $Y$ , which mean  $\lambda$  was estimated from the survey data using the maximum likelihood method. Hence:

$$\pi_k(q) = \sum_{y=0}^{+\infty} P_r(Y = y) \times \pi_k(q, y).$$

|       | HIV | HSV-2 |
|-------|-----|-------|
| $e_0$ | -   | -     |
| $e_1$ | +   | -     |
| $e_2$ | -   | +     |
| $e_3$ | +   | +     |

**Table 1: Statuses of men and women.**

## 2 Notations and models

### 2.1 Settings

The HIV and HSV-2 statuses of males are determined at recruitment  $v = 0$  and at the end of each of the 3 follow-up visits  $v = 1, 2, 3$ .

Consider an individual  $i$ . For  $v = 1, 2, 3$ , consider the period between visits  $v-1$  and  $v$ ; then, for that period, the observed data consist of:

$s_i^{(v)}$ , the number of partners of  $i$ ,  $r_i^{(v,l)}$ , his number of sexual contacts with his  $l^{\text{th}}$  partner,  $q_i^{(v,l)}$ , the age of his  $l^{\text{th}}$  partner,  $\gamma_i^{(v,l)} = 1$  denotes the use of condom with a partner (0 otherwise), and  $c_i^{(v)} = 1$  denotes a circumcision (0 otherwise).

### 2.2 Per-sex-act transmission model

#### 2.2.1 Notations

We define the transmission probability per sex act of a given virus as the probability that a person becomes infected after a sexual contact with a person infected with the virus.

Let:

$P(hiv, \overline{hsv2})$  be the transmission probability per sex act of HIV from a woman not infected by HSV-2 to a man not infected by HSV-2, not circumcised and not condom user.

$P(hsv2, \overline{hiv})$  be the transmission probability per sex act of HSV-2 from a woman not infected by HIV to a man not infected by HIV, not circumcised and not condom user.

$RR(1)$  be the relative risk of HIV transmission to males associated with the presence of HSV-2

$RR(2)$  be the relative risk of HSV-2 transmission to males associated with the presence of HIV

$RR(0,1)$  be the relative risk of HIV transmission to males associated with condom use

$RR(1,0)$  be the relative risk of HIV transmission to males associated with male circumcision

$RR(0,2)$  be the relative risk of HSV-2 transmission to males associated with condom use

$RR(2,0)$  be the relative risk of HSV-2 transmission to males associated with male circumcision.

### 2.2.2 Probabilities of transmission between two visits

We derive the expression of the transmission probability per sex act,  $\tilde{P}$ , for a male  $i$  with his  $l^{th}$  partner between the visits  $v-1$  and  $v$  ( $v = 1, 2, 3$ ):

$\tilde{P}(hiv, \overline{hsv2}, \gamma_i^{(v,l)}, c_i^{(v)}) = RR(0,1)^{\gamma_i^{(v,l)}} \times RR(1,0)^{c_i^{(v)}} \times P(hiv, \overline{hsv2})$  is the transmission probability of HIV when neither the man nor his partner is infected by HSV-2

$\tilde{P}(hiv, hsv2+, \gamma_i^{(v,l)}, c_i^{(v)}) = RR(0,1)^{\gamma_i^{(v,l)}} \times RR(1,0)^{c_i^{(v)}} \times RR(1) \times P(hiv, \overline{hsv2})$  is the transmission probability of HIV when either the male or his partner is infected by HSV-2

$\tilde{P}(hiv, hsv2++, \gamma_i^{(v,l)}, c_i^{(v)}) = RR(0,1)^{\gamma_i^{(v,l)}} \times RR(1,0)^{c_i^{(v)}} \times RR(1)^2 \times P(hiv, \overline{hsv2})$  is the transmission probability of HIV when both the male and his partner are infected by HSV-2

$\tilde{P}(hsv2, \overline{hiv}, \gamma_i^{(v,l)}, c_i^{(v)}) = RR(0,2)^{\gamma_i^{(v,l)}} \times RR(2,0)^{c_i^{(v)}} \times P(hsv2, \overline{hiv})$  is the transmission probability of HSV-2 when neither the man nor his partner is infected by HIV

$\tilde{P}(hsv2, hiv+, \gamma_i^{(v,l)}, c_i^{(v)}) = RR(0,2)^{\gamma_i^{(v,l)}} \times RR(2,0)^{c_i^{(v)}} \times RR(2) \times P(hsv2, \overline{hiv})$  is the transmission probability of HSV-2 when either the male or his partner is infected by HIV

$\tilde{P}(hsv2, hiv++, \gamma_i^{(v,l)}, c_i^{(v)}) = RR(0,2)^{\gamma_i^{(v,l)}} \times RR(2,0)^{c_i^{(v)}} \times RR(2)^2 \times P(hsv2, \overline{hiv})$  is the transmission probability of HSV-2 when both the male and his partner are infected by HIV.

### 2.2.3 Likelihood

Let

$P = (P(hiv, \overline{hsv2}), P(hsv2, \overline{hiv}))$  and  $RR = (RR(1), RR(0,1), RR(1,0), RR(2), RR(0,2), RR(2,0))$ .

Let  $i$  be an individual and  $\varphi(P, RR, \gamma_i^{(v,l)}, c_i^{(v)})$ , the vector which coordinates are:

$1 - \tilde{P}(hiv, \overline{hsv2}, \gamma_i^{(v,l)}, c_i^{(v)})$ ,  $1 - \tilde{P}(hsv2, \overline{hiv}, \gamma_i^{(v,l)}, c_i^{(v)})$ ,  $1 - \tilde{P}(hiv, hsv2+, \gamma_i^{(v,l)}, c_i^{(v)})$ ,

$1 - \tilde{P}(hsv2, hiv+, \gamma_i^{(v,l)}, c_i^{(v)})$ ,  $1 - \tilde{P}(hiv, hsv2++, \gamma_i^{(v,l)}, c_i^{(v)})$ ,

and  $1 - \tilde{P}(hsv2, hiv++, \gamma_i^{(v,l)}, c_i^{(v)})$ , respectively.

For the periods 1, 2, 3 (between visits  $v-1$  and  $v$ ,  $v=1, 2, 3$ ), the contribution to the likelihood of each individual  $i$  of the sample ( $L_{v,i}(e_k, e_j)$ , where  $e_k$  is the state at visit  $v-1$ , and  $e_j$  is the state at visit  $v$ ,  $k, j = 0,1,2,3$ ) is obtained as follow:

$$L_{v,i}(e_0, e_0) = \prod_{j=1}^{s_i^{(v)}} pm(r_i^{(v,l)}, q_i^{(v,l)}, \varphi_i^{(v,l)});$$

$$L_{v,i}(e_0, e_1) = \sum_{t=1}^{s_i^{(v)}} \left( \prod_{j=1}^{t-1} pm(r_i^{(v,l)}, q_i^{(v,l)}, \varphi_i^{(v,l)}) \right) \times um(r_i^{(v,l)}, q_i^{(v,l)}, \varphi_i^{(v,l)}) \times \left( \prod_{j=t+1}^{s_i^{(v)}} qm(r_i^{(v,l)}, q_i^{(v,l)}, \varphi_i^{(v,l)}) \right)$$

$$L_{v,i}(e_0, e_2) = \sum_{t=1}^{s_i^{(v)}} \left( \prod_{j=1}^{t-1} pm(r_i^{(v,l)}, q_i^{(v,l)}, \varphi_i^{(v,l)}) \right) \times um(r_i^{(v,l)}, q_i^{(v,l)}, \varphi_i^{(v,l)}) \times \left( \prod_{j=t+1}^{s_i^{(v)}} qm(r_i^{(v,l)}, q_i^{(v,l)}, \varphi_i^{(v,l)}) \right);$$

$$L_{v,i}(e_0, e_3) = 1 - L_{v,i}(e_0, e_0) - L_{v,i}(e_0, e_1) - L_{v,i}(e_0, e_2);$$

$$L_{v,i}(e_1, e_1) = \prod_{j=1}^{s_i^{(v)}} qm(r_i^{(v,l)}, q_i^{(v,l)}, \varphi_i^{(v,l)});$$

$$L_{v,i}(e_1, e_3) = 1 - \prod_{j=1}^{s_i^{(v)}} qm(r_i^{(v,l)}, q_i^{(v,l)}, \varphi_i^{(v,l)});$$

$$L_{v,i}(e_2, e_2) = \prod_{j=1}^{s_i^{(v)}} rm(r_i^{(v,l)}, q_i^{(v,l)}, \varphi_i^{(v,l)});$$

$$L_{v,i}(e_2, e_3) = 1 - \prod_{j=1}^{s_i^{(v)}} rm(r_i^{(v,l)}, q_i^{(v,l)}, \varphi_i^{(v,l)});$$

With

$$\varphi_i^{(v,j)} = \varphi(P, RR, \gamma_i^{(v,j)}, c_i^{(v)}),$$

and for any

$$\xi = (\xi_1, \xi_2, \xi_3, \xi_4, \xi_5, \xi_6), 0 < \xi_1, \xi_2, \xi_3, \xi_4, \xi_5, \xi_6 < 1,$$

$r, q$  integers:

$$pm(r, q, \xi) = \pi_0(q) + \pi_1(q)\xi_1^r + \pi_2(q)\xi_2^r + \pi_3(q)\xi_3^r \xi_4^r;$$

$$qm(r, q, \xi) = \pi_0(q) + \pi_1(q) + \pi_2(q)\xi_3^r \xi_4^r + \pi_3(q) \cdot \xi_6^r + \pi_2(q)(1 - \xi_3)\xi_4 \sum_{j=1}^r (\xi_3 \xi_4)^{r-j} \xi_6^{j-1};$$

$$rm(r, q, \xi) = \pi_0(q) + \pi_2(q) + \pi_1(q)\xi_3^r \xi_4^r + \pi_3(q) \cdot \xi_5^r + \pi_1(q)(1 - \xi_4)\xi_3 \sum_{j=1}^r (\xi_3 \xi_4)^{r-j} \xi_5^{j-1};$$

$$um(r, q, \xi) = \pi_1(q)(1 - \xi_1^r) + \pi_3(q)\xi_4(1 - \xi_3) \sum_{j=1}^r \xi_6^{j-1} (\xi_3 \xi_4)^{r-j};$$

$$vm(r, q, \xi) = \pi_2(q)(1 - \xi_2^r) + \pi_3(q)\xi_3(1 - \xi_4) \sum_{j=1}^r \xi_5^{j-1} (\xi_3 \xi_4)^{r-j}.$$

## 2.3 Per-partnership transmission model

### 2.3.1 Notation

In this setting the transmission probability refers to the transmission probability per partnership from a woman to a man not infected. Thus, the previous model for transmission probability can be used with the following convention:

$P(hiv, hsv2)$  denotes the transmission probability per partnership of HIV from a woman not infected by HSV-2 to a man not infected by HSV-2.

$P(\overline{hsv2}, \overline{hiv})$  denotes the transmission probability per partnership of HSV-2 from a woman not infected by HIV to a man not infected by HIV.

### 2.3.2 Probabilities of transmission between two visits

When a male  $i$  is with his  $l^{\text{th}}$  partner between the visits  $v-1$  and  $v$  ( $v=1,2,3$ ), the transmission probabilities per partnership are given by the same formulas as those of section 2.2.3.

### 2.3.3 Likelihood

The likelihood is obtained by setting  $r_i^{(v,l)} = 1$  for all  $i, v, l$ , and using the formulas of section 2.2.3.
